# Supplementary material
Source: publisher site journal article supplement (https://www.dovepress.com/article/290053)
Supplement: Supplementary file 1 [file get_supplementary_file.php]

**Supplementary Table S1.** The optimal cutoff values of hematological factors for overall survival by Receiver operating characteristic (ROC) curve analysis.

| **covariates** | **cutoff values** |
| --- | --- |
| NLR | 1.706 |
| PLR | 87.857 |
| LMR | 3.067 |
| PNI | 56.5 |
| AGR | 1.908 |
| RDW | 12.8 |
| GLC | 6.57 |
| LDH | 182 |
| FIB | 3.81 |
| DD | 0.183 |

**Abbreviations:** NLR, the neutrophil-to-lymphocyte ratio; PLR, the platelet-to-lymphocyte ratio; LMR, the lymphocyte -to- monocyte ratio; PNI, the prognostic nutrition index; AGR, albumin-to-globulin ratio; RDW, red blood cell distribution width; GLC, glucose; LDH, lactate dehydrogenase; FIB, fibrinogen; DD, D-dimer.
